# Supplementary material for: Description and evaluation of aerosol in UKESM1 and HadGEM3-GC3.1 CMIP6 historical simulations
Source: Copernicus journal article supplement (doi:10.5194/gmd-2019-357), 2020-03-25
Supplement: Supplementary file 1 [file gmd-2019-357-supplement.pdf]

Supplementary material to: “*Description and evaluation of aerosol in UKESM1 and HadGEM3-GC3.1 CMIP6 historical simulations*”, submitted to Geosci. Model Dev.

Jane P. Mulcahy et al.

Met Office, FitzRoy Road, Exeter, EX1 3PB, UK

December 5, 2019

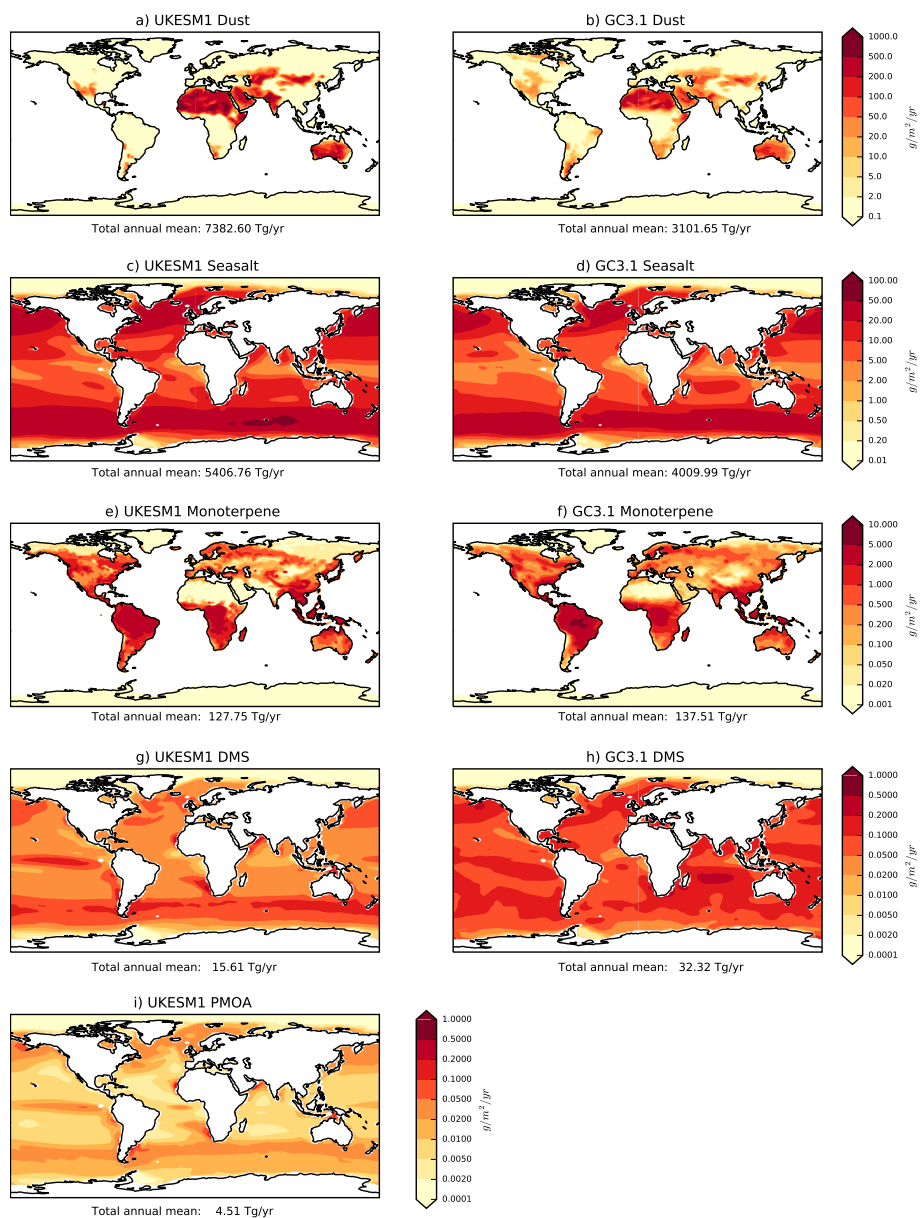

Figure 1: Annual mean emissions of (a,b) mineral dust, (c,d) sea-salt, (e,f) monoterpenes, (g,h) dimethyl sulfide (DMS) and (i) primary marine organic aerosol (PMOA) in (left) UKESM1 and (right) GC3.1. The annual emissions are calculated from an 18 year AMIP simulation covering the period 1980-1998. GC3.1 does not include a representation of PMOA.

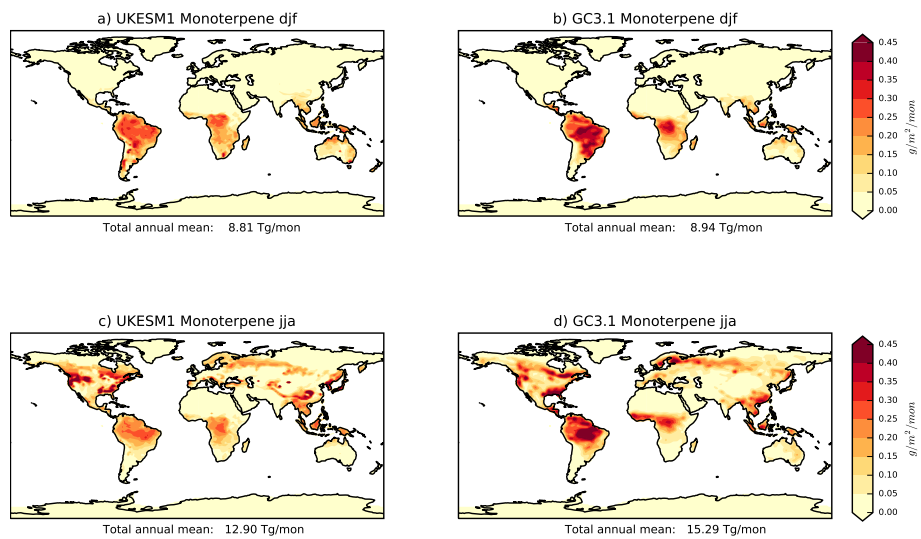

Figure 2: Monoterpene emissions from (a,b) DJF and (c,d) JJA, in (left) UKESM1 and (right) GC3.1. Emissions are calculated from an 18 year AMIP simulation covering the period 1980-1998.
